# Supplementary material for: Analysis of off-target effects of CRISPR/Cas-derived RNA-guided endonucleases and nickases
Source: HighWire-hosted journal article supplement (doi:10.1101/gr.162339.113), 2013-11-19
Supplement: Supplemental_Table_2.xlsx [file Supplemental_Table_2.xlsx]

## Sheet: Sheet1
Supplemental Table 2. List of potential off-target sequences with one- to three-base mismatches and indel frequencies measured using deep sequencing. Mismatches are shown in small letters. N.D., not detected.
sequence name	Chr#	position	sequence in hg19 (X20NGG)	strand	# of mismatched bases	sequence in K562 (different only)	Indel (%)
							RGEN(-)	RGEN(+)
CCR5	chr3	46414422	TGACATCAATTATTATACATCGG	+	0		0.007387	60.2074	OnTarget
	chr21	39019463	TGACATCAcTTATTATgCATGGG	+	2		0.004405	0.000872	Off15
	chr7	146318937	TGACATaAATTATTcTACATGGG	+	2		0.001654	0.000585	Off16
	chr5	50294224	TGAaATCAATTATcATAgATCGG	-	3		0.001406	0.000871	Off18
	chr10	95196887	TGACATCAAaTATTAcACAaTGG	+	3		0.008056	0.005506	Off19
	chr15	81732423	TtACATCAATTATgATACAgTGG	+	3		0.008149	0.011327	Off20
	chr1	32462761	TGACtTCAATgATTATACAgTGG	-	3		0.003017	0.001668	Off21
	chr20	57734126	TcACATCAATTATTATAgcTTGG	+	3		0.003393	0.005564	Off22
	chr12	86351686	TGACATaAATTATTtTACtTAGG	+	3		0.013721	0.019134	Off23
	chr5	22659531	TGAaATCAATTtTTATACtTGGG	+	3		0.013799	0.012525	Off24
	chr13	82752018	TGACATCAATTAaTtTtCATTGG	-	3		0.007876	0.013825	Off25
	chr13	32810787	TGAaATgAATTATTAaACATTGG	-	3		0.013704	0.003294	Off26
	chr4	28318013	TGtCAcCAATTATTAcACATTGG	-	3		0.005236	0.002771	Off27
	chr3	113164144	TGACtTCAcTTATgATACATGGG	+	3		0.011935	0.008497	Off28
CCR5-1	chr3	46415039	GAATCCTAAAAACTCTGCTTCGG	+	0			32.1896	OnTarget
	chr3	46399688	GAATCCTgAAAACcCTGCTTCGG	+	2		0.023312	0.041926	CCR2
	chr3	68283618	GAATCCTAAAtACTCTcCTTCGG	-	2		N.D.	0.00519805
	chr4	174165063	GAATCCTAAAAttTCTGCTTTGG	-	2		0.00865751	0.0140345
	chr1	175514051	GAtTCCTAAAActTCTGCTTGGG	-	3		0.00545782	0.00319862
	chr1	188362836	GAAaCCTAAAAACaCTaCTTGGG	-	3		0.00799345	0.00460292
	chr3	156643270	GAATCCTcAAtAtTCTGCTTAGG	+	3		N.D.	0.00515801
	chr3	196898094	GAtTtaTAAAAACTCTGCTTAGG	+	3		0.0127919	N.D.
	chr4	24766903	GcATCtTAAAcACTCTGCTTGGG	+	3		0.00584784	0.00792676
	chr11	48583044	tAATCCTAAAAgCTCTGtTTTGG	+	3		0.00622152	0.014644
	chr11	126100128	aAATCCTAAAgACTtTGCTTGGG	-	3		0.0102859	0.00810258
	chr20	31876172	GAAcCCTcAAAACTCTGtTTGGG	-	3		N.D.	N.D.
	chr5	142061946	GAATtCTAAAAAggCTGCTTTGG	-	3		0.0136921	0.00665037
	chr6	51880791	GAATCCccAAAACTCTtCTTTGG	-	3		N.D.	0.0128626
CCR5-2	chr3	46415043	GACACCGAAGCAGAGTTTTTAGG	-	0			34.6024	OnTarget
	chr3	46399692	GACACCGAAGCAGgGTTTTcAGG	-	2		0.089008	0.080218	CCR2
	chr4	77089250	GAaACaGAAGCAGAGTgTTTAGG	-	3		0.0150703	0.0149849
	chr6	76069903	GAtACtGAAGCAGAGaTTTTGGG	-	3		0.0554706	0.0398674
	chr7	100221099	GACAaCaAAGtAGAGTTTTTAGG	-	3		0.112118	0.100768
	chr8	133806493	GACAataAAGCAGAGTTTTTTGG	+	3		0.372022	0.325235
	chr9	26728805	GACACtGAAGCAGtGaTTTTAGG	-	3		0.0462926	0.0536913
	chr11	109269650	cACACCGAAGCtGgGTTTTTAGG	+	3		0.103613	0.111054
	chr12	103345126	GtCAaCGAAGCAGAGTTgTTGGG	+	3		N.D.	N.D.
	chr14	76188505	GAgACaGAAGgAGAGTTTTTAGG	-	3		0.156577	0.0549249
CCR5-3	chr3	46415001	GGTCCTGCCGCTGCTTGTCATGG	+	0			8.68186	OnTarget
	chr3	46399650	GGTCCTGCCGCTGCTcaTCATGG	+	2		0.002119	0.003454	CCR2
	chr4	37997513	GGTCCTGtCGCTGCTTGcCATGG	-	2		N.D.	0.0116163
	chr6	34194502	GGTCCTGCtGCTGCTTGTCtGGG	-	2		0.0144485	0.0138621
	chr4	135248225	GtTCCTGCtGCTGCTTcTCAAGG	-	3		0.015339	0.0322534
	chr7	2187497	GGgCCTGCtGCTGCTgGTCAAGG	+	3		0.00491848	0.00671471
	chr7	40749499	GGTgCTGCtGCTGCTaGTCAGGG	+	3		0.00245221	N.D.
	chr7	116481825	GGTgCTGatGCTGCTTGTCAGGG	-	3		0.00628802	0.00738843
	chr10	125109633	GGcCCTGCCGCTGCaTGaCATGG	-	3		N.D.	N.D.
	chr12	58088075	GaTCCTGCCGtTGCcTGTCATGG	+	3		N.D.	N.D.
	chr13	62359865	GGTCCTGCtGCaGCTTcTCATGG	-	3		N.D.	N.D.
	chr14	41044533	cGTCCTGCCaCTGCaTGTCATGG	-	3		N.D.	N.D.
	chr15	83334932	GGTCCTcCCGCTGCTTcTCcGGG	-	3		N.D.	0.00346693
	chr15	86284395	GGTCCTGgCGCTGCTTcTCcAGG	-	3		N.D.	N.D.
CCR5-4	chr3	46415067	AAATGAGAAGAAGAGGCACAGGG	+	0			53.221	OnTarget
	chr3	46399716	AAAcGAGAAGAAGAGGCAtAGGG	+	2		0.006358	1.81801	CCR2
	chr1	82441501	AAATGAGAAcAAGAGGCAgAGGG	-	2		N.D.	0.00325024
	chr12	131177815	AAATGtGAAGAAaAGGCACAGGG	+	2		0.0716582	0.0186316
	chr14	58518941	AAATGAGAAtAAGAGGaACAGGG	-	2		0.00903567	0.00344353
	chr1	60161281	AAATGAGAAGttGAGGCtCATGG	+	3		N.D.	N.D.
	chr1	75107576	AAATcAtAtGAAGAGGCACAAGG	+	3		0.0183865	0.00705729
	chr10	79410852	AAAcGAGAAGAAGctGCACATGG	+	3		N.D.	N.D.
	chr10	93484022	AAATGAGAAGAtcAGtCACAAGG	-	3		0.00983542	0.00998752
	chr11	127759550	AAATGAGgAcAAGAGGCAgAGGG	+	3		0.0134326	0.014595
	chr13	91416319	AAATGAGAAGgAGtGGCAgATGG	-	3		N.D.	N.D.
	chr14	35625927	AAATGAGAAaAAtAGGCAgAGGG	+	3		0.00373573	0.00947957
	chr15	29656542	AAAaGAGAAGctGAGGCACAGGG	-	3		N.D.	N.D.
	chr16	21069051	AAAgGAGAAGgAGAGGCAgATGG	+	3	AAAgGAGAAGgAGAGGCAgACGG	N.D.	N.D.
CCR5-5	chr3	46414488	CCTGCCTCCGCTCTACTCACTGG	+	0			68.2348	OnTarget
	chr3	46399149	CCTGCCTCCGCTCTACTCgCTGG	+	1		0.007029	1.62972	CCR2
	chr1	151346656	CCTGCCTCCtCTCTAtTCtCCGG	+	3		N.D.	N.D.
	chr1	40149529	CCTGCCTCCGCgCTgCTCtCGGG	-	3		N.D.	N.D.
	chr2	239016933	CCTGCCaCaGCTCTACTCgCAGG	-	3		N.D.	0.00362463
	chr10	72326314	CCTGCCTCtGCTCTcCTCcCAGG	+	3		0.00918295	N.D.
	chr11	45413262	CCTGCCTCCtgTCTACTCtCAGG	-	3		N.D.	N.D.
	chr11	75166398	CCTGCCctCaCTCTACTCACAGG	-	3		N.D.	0.0292846
	chr12	52993822	CCTGtCTCCtCTCcACTCACTGG	+	3		N.D.	N.D.
	chr12	111877652	CCTGgCTCCtCTCTcCTCACTGG	+	3		N.D.	N.D.
	chr14	92900438	CCaGtCTCCGCTCTcCTCACTGG	-	3		0.00208842	0.00497686
	chr15	86576166	CCTGCCTCCtCaCTcCTCACAGG	+	3		0.00364904	N.D.
CCR5-6	chr3	46414495	ATGAACACCAGTGAGTAGAGCGG	-	0			43.9477	OnTarget
	chr3	46399156	ATGAACACCAGcGAGTAGAGCGG	-	1		0.007029	29.4407	CCR2
	chr3	132116627	ATGAACtCCtGTGAGTAGAGAGG	+	2		0.00767872	0.00607681
	chr2	141099498	ATGAACtCCAGgGAGaAGAGAGG	+	3		N.D.	N.D.
	chr2	201563445	AgGAAaACCAGTGAGaAGAGTGG	+	3		N.D.	0.00330497
	chr10	128303264	AaGAACAgCAGTGAaTAGAGAGG	+	3		0.0424543	0.0290533
	chr10	7087455	AgGAACACCAGTGgGaAGAGAGG	-	3		N.D.	N.D.
	chr11	87003145	AgaAACACtAGTGAGTAGAGGGG	-	3		0.0195899	0.0346719
	chr12	26868590	ATGAACACCAGTGAaTAcAtAGG	+	3		N.D.	N.D.
	chr12	56197551	ATGAACACCAGTGAaTAaAaTGG	+	3		0.0229337	N.D.
	chr13	40360295	ATGAACcCtAGTGAGaAGAGAGG	+	3		N.D.	N.D.
	chr15	83299508	AaGAACACaAGaGAGTAGAGAGG	+	3		N.D.	0.0782144
	chr20	19397165	AaGgACACCAGTGAGgAGAGTGG	+	3		N.D.	N.D.
CCR5-7	chr3	46414492	AACACCAGTGAGTAGAGCGGAGG	-	0			41.9214	OnTarget
	chr3	46399153	AACACCAGcGAGTAGAGCGGAGG	-	1		0.002343	42.7287	CCR2
	chr10	110654535	AACACCAGTGAGaAGAGCtGTGG	-	2		N.D.	0.00465408
	chr3	13116654	AACtCCAGTGAGgAGAGgGGTGG	-	3		0.0171834	0.019302
	chr3	47757009	AAaACCAGTGAGcAGAGtGGAGG	-	3		N.D.	N.D.
	chr10	30904272	AAaAgCAGaGAGTAGAGCGGTGG	+	3		N.D.	N.D.
	chr16	87942782	tACtCCAGTGAGTAGAGaGGCGG	-	3		0.0103638	0.105597
CCR5-8	chr3	46414488	CCAGTGAGTAGAGCGGAGGCAGG	-	0			19.7192	OnTarget
	chr3	46399149	CCAGcGAGTAGAGCGGAGGCAGG	-	1		0.018743	2.7367	CCR2
	chr14	92900438	CCAGTGAGgAGAGCGGAGaCTGG	+	2		N.D.	0.00829476
	chr2	74899301	CCAGTGAGcAGAGaGGAaGCTGG	-	3			0.00721408
	chr3	38723710	CCAcTGAGTAGAGgGGtGGCGGG	-	3		0.00439387	0.0150248
	chr5	131892772	CCgGTGgGgAGAGCGGAGGCGGG	-	3		N.D.	N.D.
	chr10	30904276	gCAGaGAGTAGAGCGGtGGCTGG	+	3		N.D.	N.D.
	chr12	16763421	aCAGTGAGTAGAGtGGAGtCCGG	-	3		N.D.	N.D.
	chr12	52993822	CCAGTGAGTgGAGaGGAGaCAGG	-	3		N.D.	N.D.
	chr12	111877652	CCAGTGAGgAGAGaGGAGcCAGG	-	3		N.D.	N.D.
	chr13	74232018	CCAcTGAGcAGAGaGGAGGCTGG	+	3		0.00709044	0.00304108
	chr22	38027103	CCAGTGAGTAGgGCtGgGGCAGG	+	3		0.0492203	N.D.
C4BPB	chr1	207265077	AATGACCACTACATCCTCAAGGG	+	0		0.028138	74.6497	OnTarget
	chr3	128616523	AAgaAgCACTACATCCTCAATGG	+	3		0.007336	0.003831	Off1
	chr9	1945906	AATGACCACTACATtCTCttGGG	+	3		0.007698	0.020335	Off7
	chr1	202445405	AATGACCACagCATCCTCAgTGG	+	3		0.025823	0.13998	Off8
	chr9	140949281	AATGACCACTACAcCCagAAAGG	-	3		0.030572	0.027676	Off9
	chr12	12664644	AtTaACCACTACATtCTCAAAGG	+	3		0.022359	0.015942	Off10
